# Supplementary material for: Effect of defects controlled by preparation condition and heat treatment on the ferromagnetic properties of few-layer graphene
Source: PubMed Central journal article supplement (PMC5517599; doi:10.1038/s41598-017-06224-w), 2017-07-19
Supplement: 41598_2017_6224_MOESM1_ESM.pdf [file 41598_2017_6224_MOESM1_ESM.pdf]

# Supplementary Information

## Effect of defects controlled by preparation condition and heat treatment on the ferromagnetic properties of few-layer graphene

Qinghua, Miao <sup>a,1</sup>, Lidong Wang <sup>a,1\*</sup>, Zhaoyuan Liu <sup>a,1</sup>, Bing Wei <sup>a</sup>, Jinhui Wang <sup>b\*</sup>, Xiangli Liu <sup>c\*</sup> & Weidong Fei <sup>a,b</sup>

<sup>a</sup> School of Materials Science and Engineering, Harbin Institute of Technology, Harbin 150001, China.

<sup>b</sup> School of Mechanical Engineering, Qinghai University, Xining 810016, China.

<sup>c</sup> Department of Materials Science and Engineering, Shenzhen Graduated School, Harbin Institute of Technology, Shenzhen 518055, P.R. China.

\* Corresponding author

1. Author Qinghua Miao, Lidong Wang and Zhaoyuan Liu contributed equally to this work.

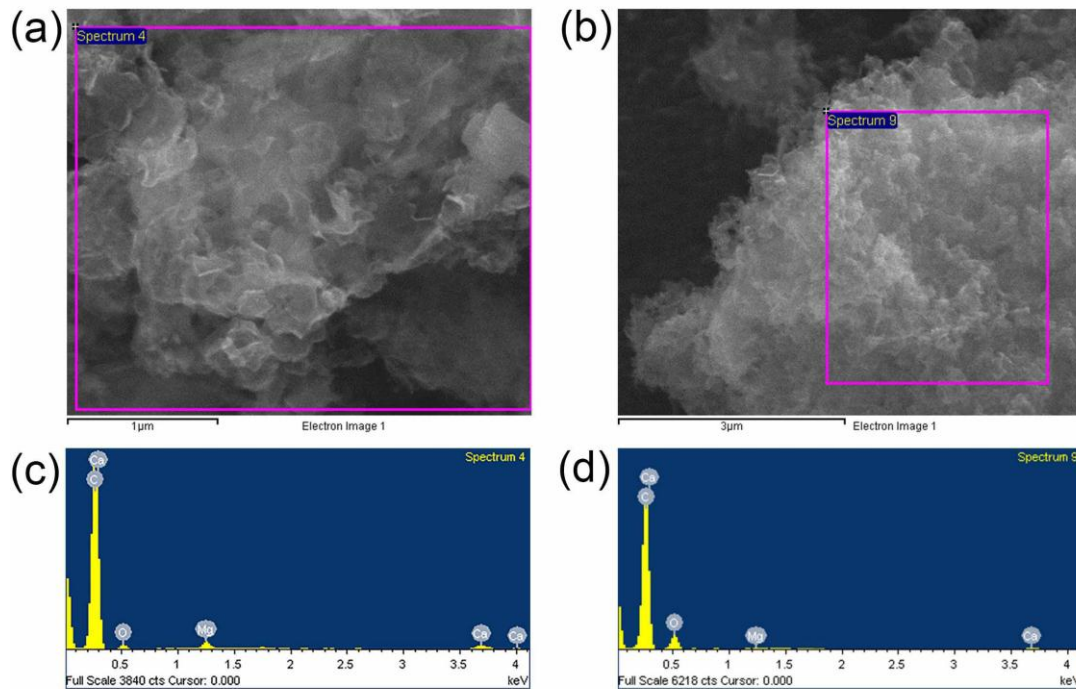

**Fig. S1** SEM of M2C1-G (a) and M4C1-G (b), EDX of M2C1-G (c) and M4C1-G (d)

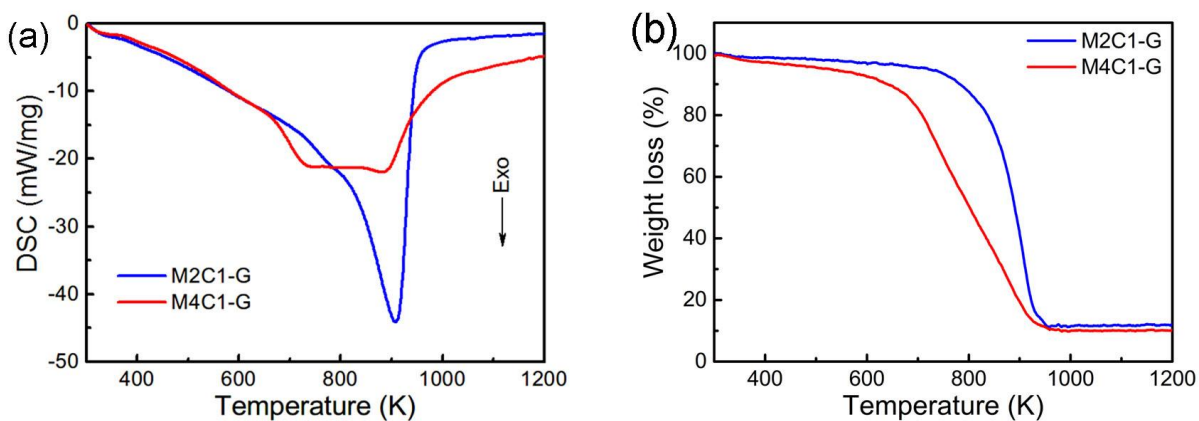

**Fig. S2** TG of M2C1-G (a) and M4C1-G (b)

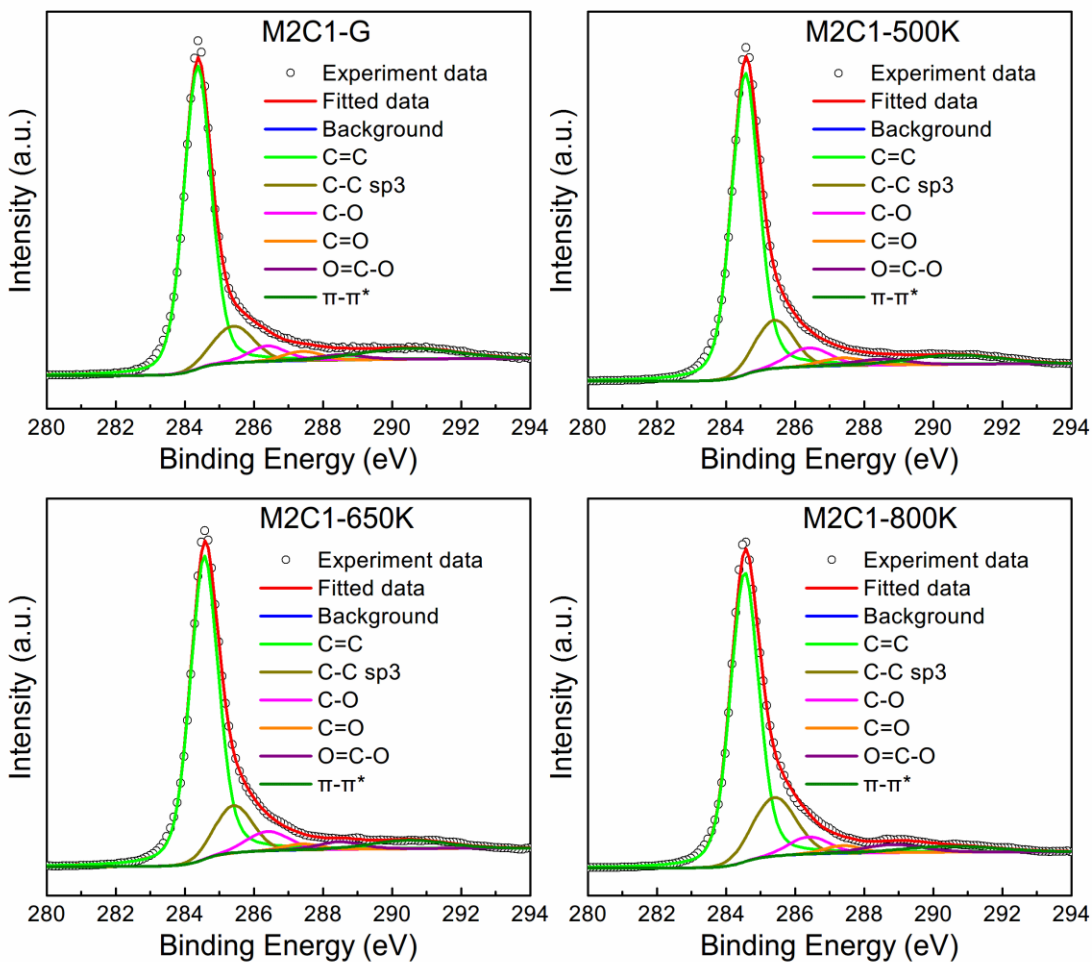

**Fig. S3** XPS C 1s spectra of M2C1 at different heat treatment temperatures

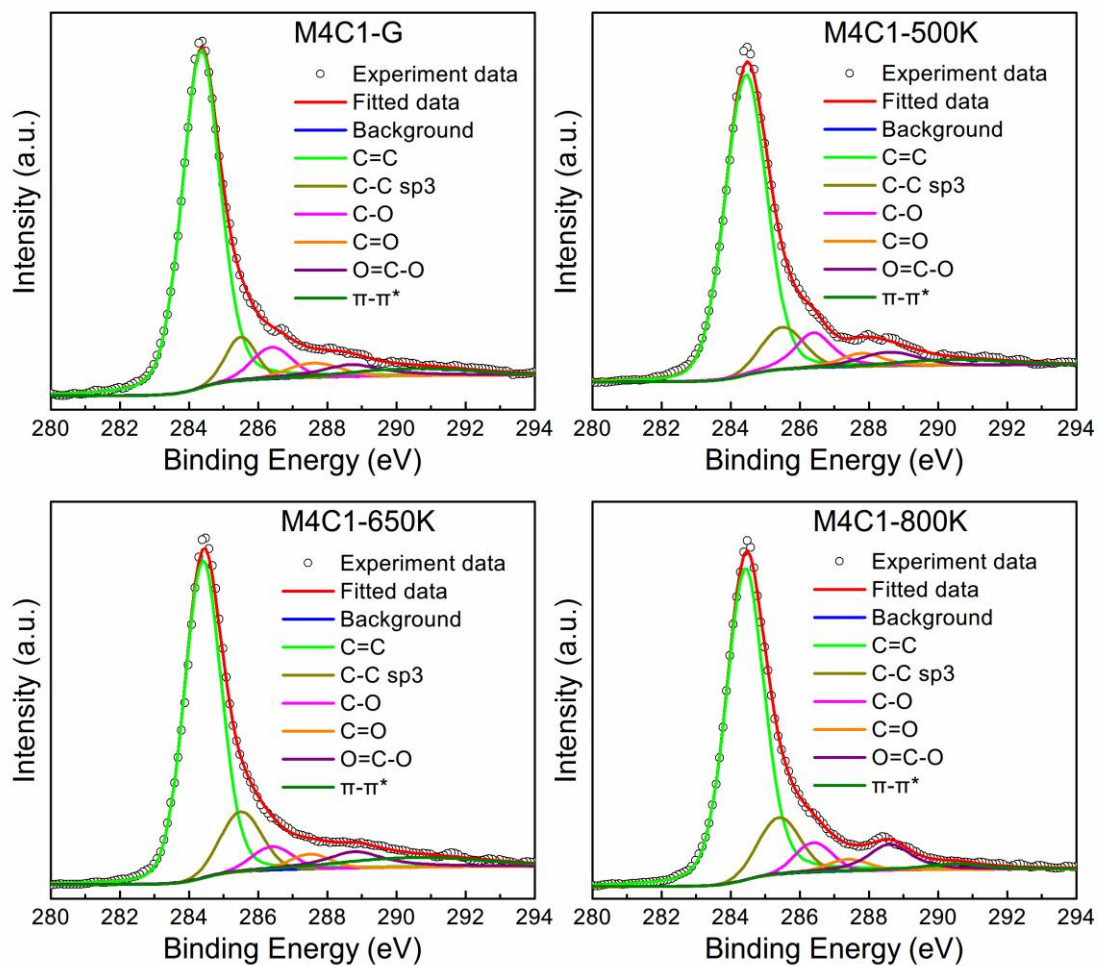

**Fig. S4** XPS C 1s spectra of M4C1 at different heat treatment temperatures

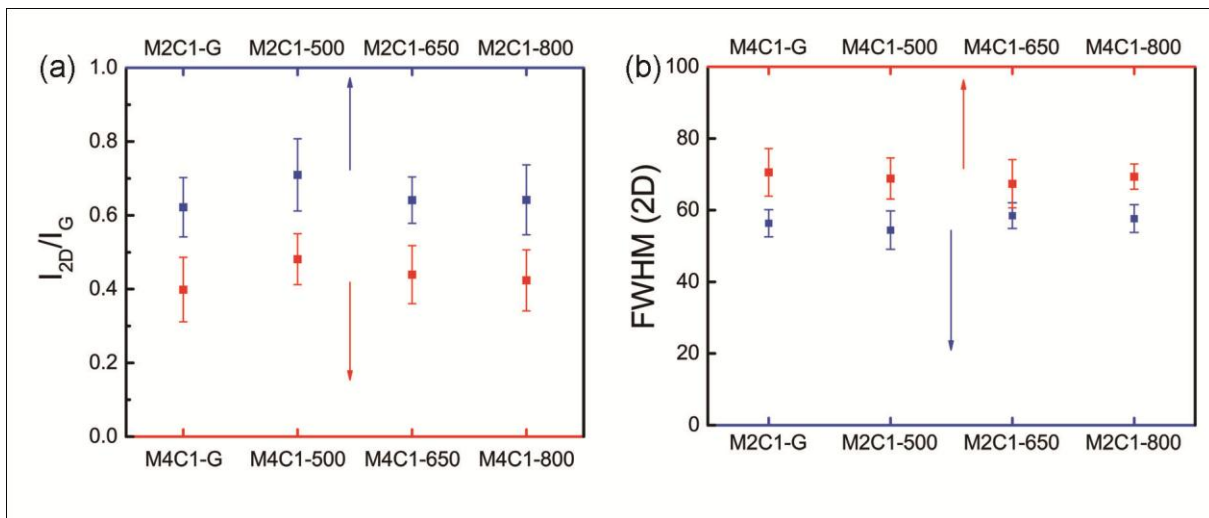

**Fig. S5** The ratio of  $I_{2D}/I_G$  (a) and the FWHM of 2D peak (b) for M2C1 and M4C1 at different treated temperature
